# Supplementary material for: A first-principles study on divergent reactions of using a Sr3Fe2O7 cathode in both oxygen ion conducting and proton conducting solid oxide fuel cells
Source: Royal Society of Chemistry journal article supplement (doi:10.1039/c8ra04059a), 2018-01-01
Supplement: c8ra04059a1.pdf [file c8ra04059a1.pdf]

### Supporting Information

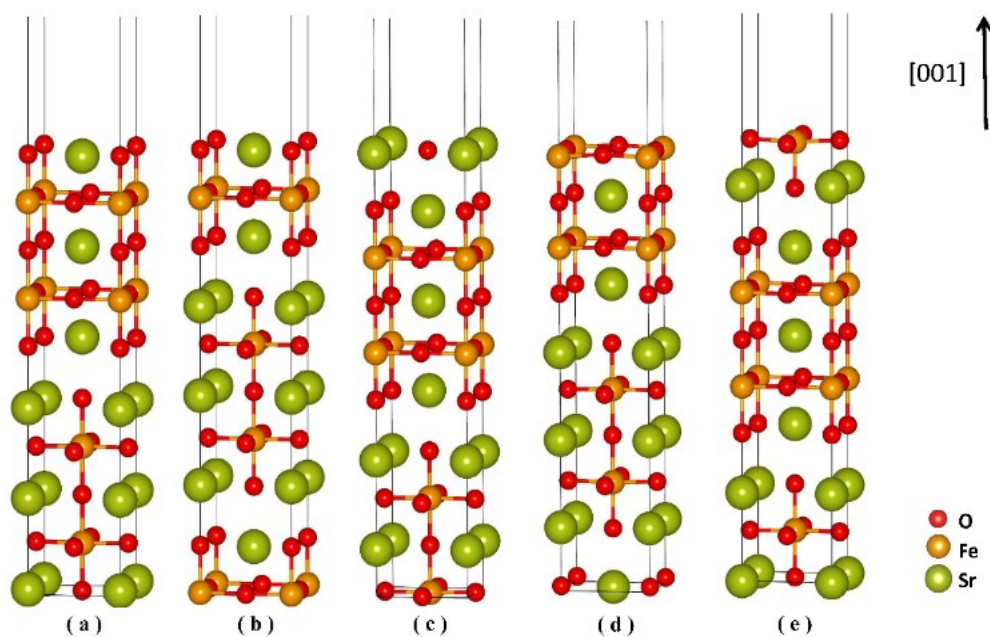

**Figure S1** (a)SrO-1, (b)SrO-2, (c)SrO-3, (d) FeO-1 and (e) FeO-2 (001) terminal surfaces of  $\text{Sr}_3\text{Fe}_2\text{O}_7$ .

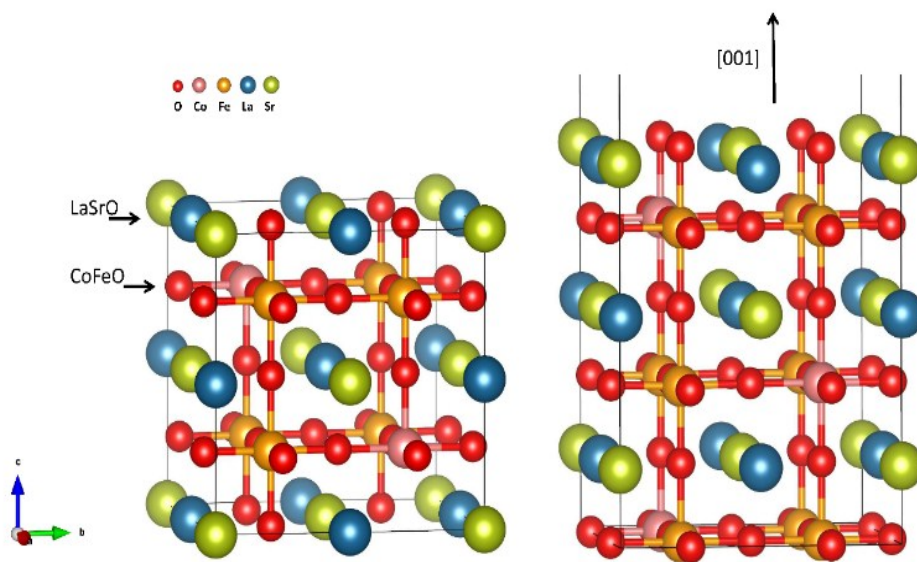

**Figure S2** (left) The elementary LSCF crystal structure with 40 atoms. (right) Side views of the perfect LSCF (001) surface.

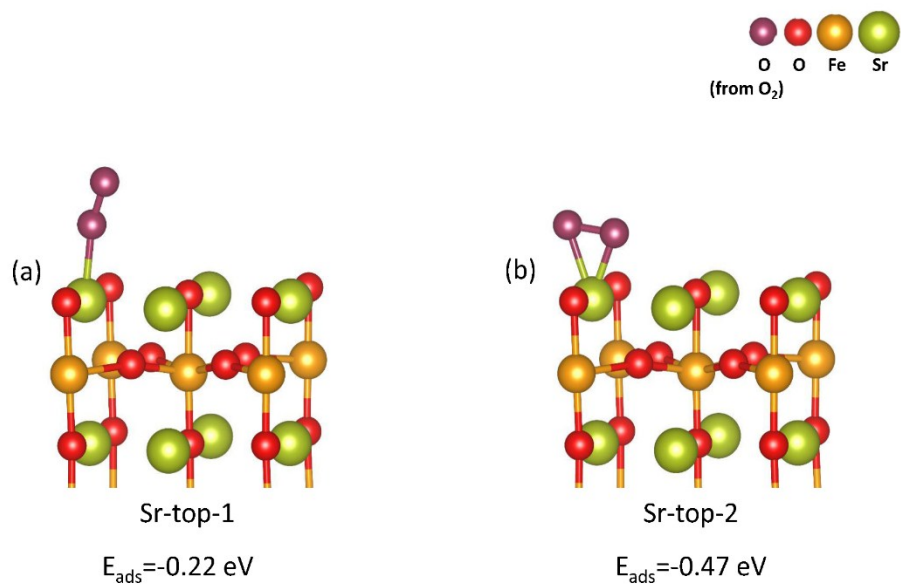

**Figure S3** (left) The optimized O<sub>2</sub> adsorption structures on the SrO-terminated Sr<sub>3</sub>Fe<sub>2</sub>O<sub>7</sub> (001) surface.

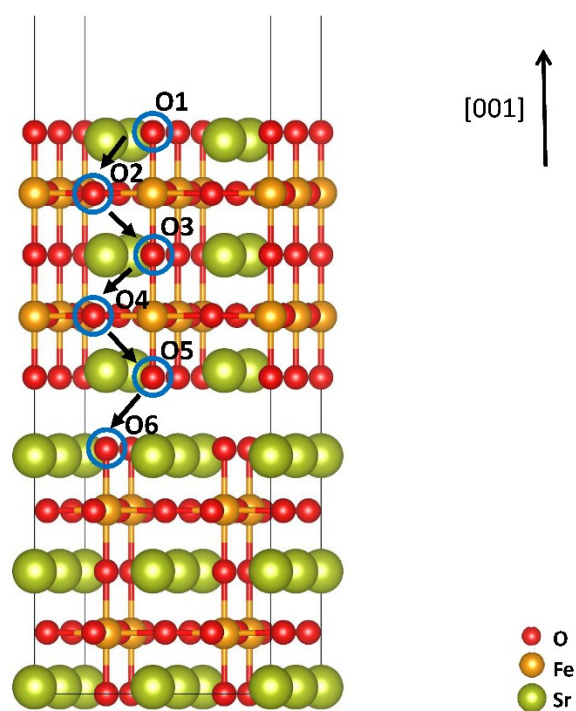

**Figure S4** Migration paths of oxygen ions in the surface model of Sr<sub>3</sub>Fe<sub>2</sub>O<sub>7</sub>, where O<sub>n</sub> (n = 1, 2, 3, 4, 5, 6) denotes the sites of oxygen ions.

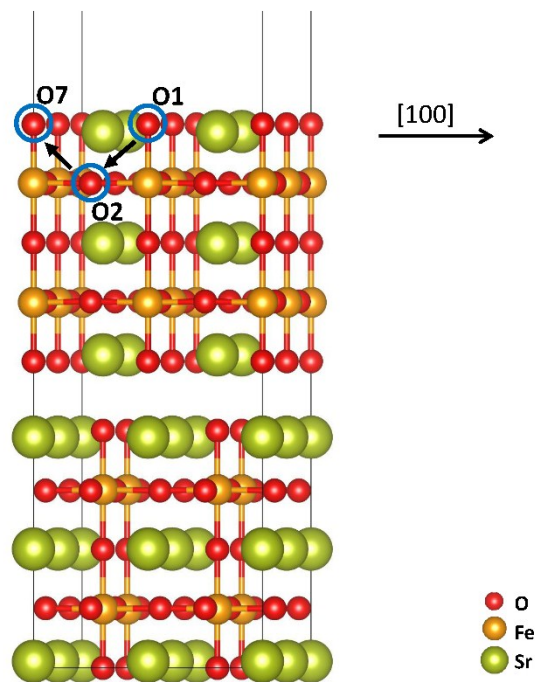

**Figure S5** Migration path of oxygen ions along [100] direction in the surface model of  $\text{Sr}_3\text{Fe}_2\text{O}_7$ , where  $\text{O}_n$  ( $n = 1, 2, 3, 4, 5, 6$ ) denotes the sites of oxygen ions.

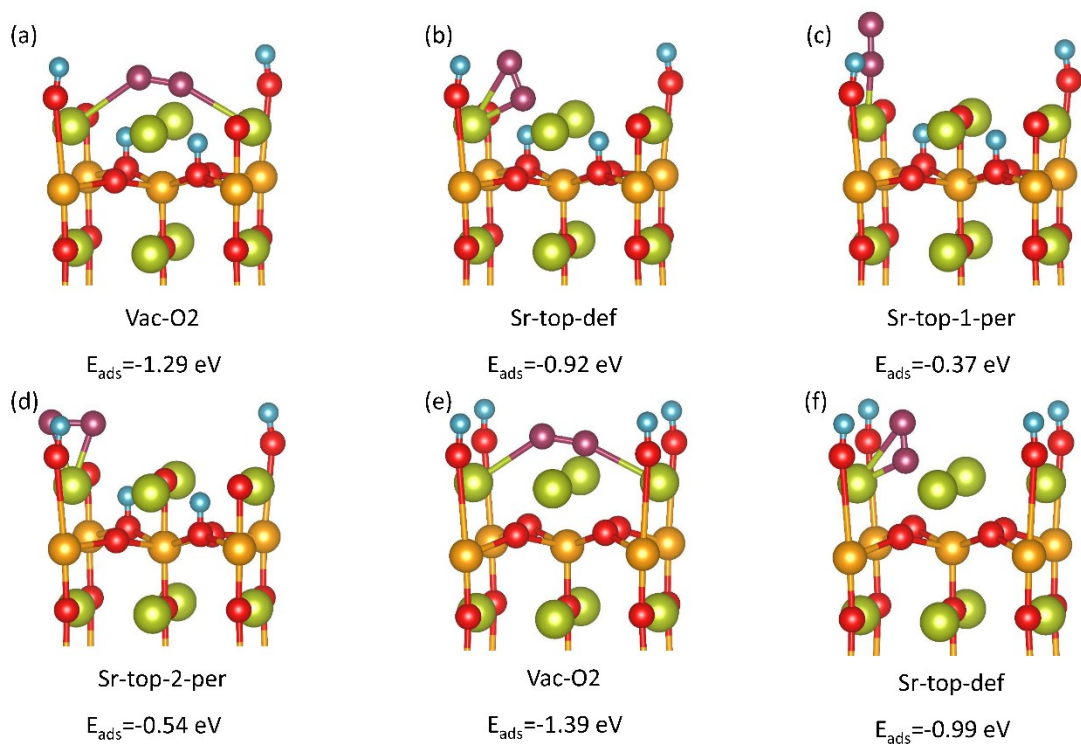

**Figure S6** Optimized  $\text{O}_2$  adsorption structures on the SrO-terminal  $\text{Sr}_3\text{Fe}_2\text{O}_7$  (001) surface. (a) and (b) is on SrO-1-2H with one oxygen vacancy, (c) and (d) is on SrO-1-2H without oxygen vacancy, and (e) and (f) is on SrO-1-4H with one oxygen vacancy.

**Table S1** Energy barriers for oxygen ion migration in the surface model and bulk model<sup>1</sup> along the [001] direction.

| Barriers/eV             | O1→O2 | O2→O3 | O3→O4 | O4→O5 | O5→O6 |
|-------------------------|-------|-------|-------|-------|-------|
| Surface model           | 0.35  | 0.22  | 0.74  | 0.26  | 1.04  |
| Bulk model <sup>1</sup> | 0.38  | 0.40  | 0.97  | 0.86  | 1.40  |

**Table S2** Energy barriers of oxygen ion migration in the surface model and bulk model<sup>1</sup> along the [100] direction.

| Barriers/eV             | O1→O2 | O2→O7 |
|-------------------------|-------|-------|
| Surface model           | 0.35  | 0.18  |
| Bulk model <sup>1</sup> | 0.97  | 0.40  |

## Notes and references

1.Huan, D.; Wang, Z.; Wang, Z.; Peng, R.; Xia, C.; Lu, Y., High-Performanced Cathode with a Two-Layered R-P Structure for Intermediate Temperature Solid Oxide Fuel Cells. *ACS applied materials & interfaces* **2016**, *8* (7), 4592-9.
